# Supplementary material for: A dynamical framework for complex fractional killing
Source: PubMed Central journal article supplement (PMC5556027; doi:10.1038/s41598-017-07422-2), 2017-08-14

Supplementary information for the manuscript “*A dynamical framework for complex fractional killing*”

Richard Ballweg<sup>1</sup> Andrew L. Paek<sup>2</sup> and Tongli Zhang<sup>1\*</sup>

<sup>1</sup> Department of Molecular and Cellular Physiology, College of Medicine, University of Cincinnati, Cincinnati, OH

<sup>2</sup> Department of Molecular and Cellular Biology, University of Arizona, Tucson, AZ

\* Correspondence should be addressed to [Tongli.zhang@uc.edu](mailto:Tongli.zhang@uc.edu)

**Supplementary Figure 1.** Effect of the level of noise on time series simulations. The integrated levels of p53 are shown. Red curves indicate apoptotic cells while blue curves indicate surviving cells. **A & B**, 300 cells were subjected to a low level of drug (drug=0.45), and the values of the chosen parameters were randomized between 60-140% (**A**) or 80-100% (**B**) of their basal values. **C & D**, 300 cells are subjected to a high level of drug (drug=1), and the parameter values are randomized 60-140% (**C**) or 80-100% (**D**).

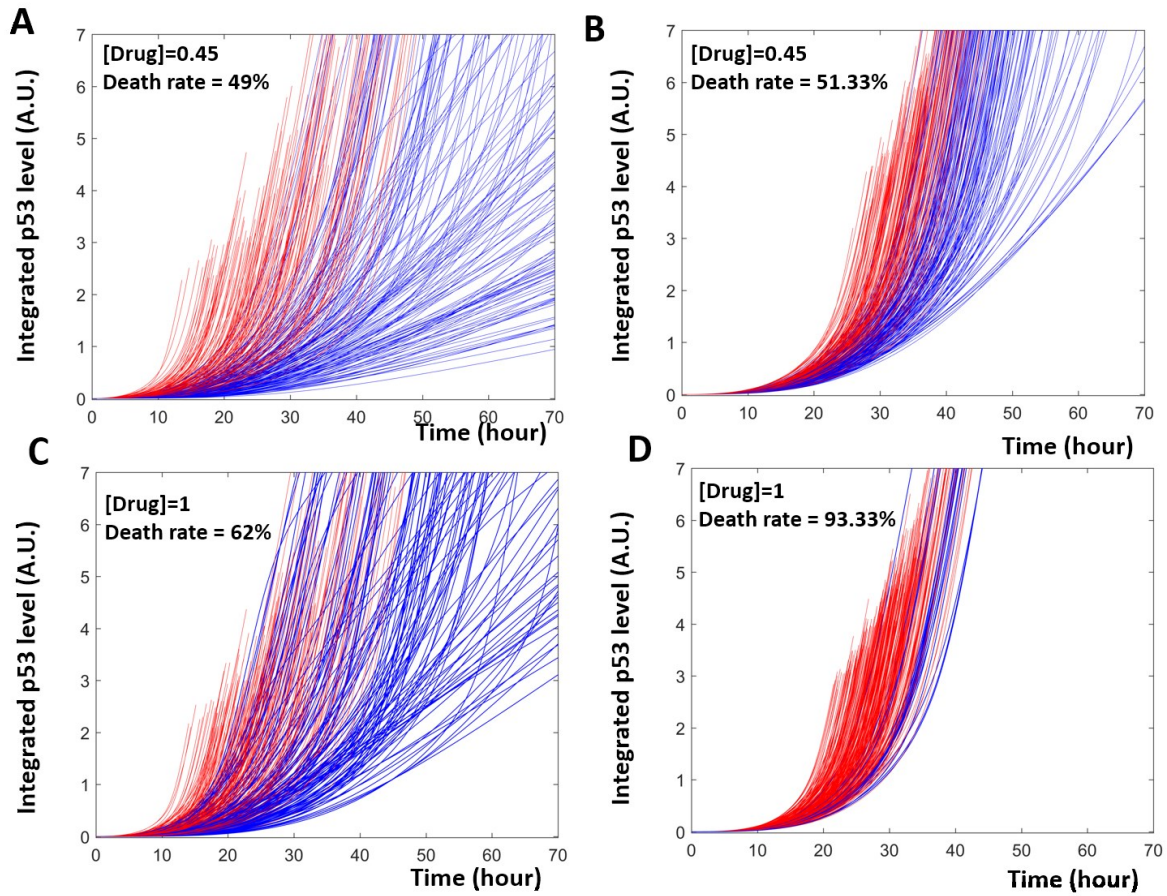

Supplement: 41598_2017_7422_MOESM1_ESM.pdf [file 41598_2017_7422_MOESM1_ESM.pdf]
